# Supplementary material for: Hard-to-reach populations of men who have sex with men and sex workers: a systematic review on sampling methods
Source: PubMed Central journal article supplement (PMC4627393; doi:10.1186/s13643-015-0129-9), 2015-10-30
Supplement: 13643_2015_129_MOESM1_ESM.pdf [file 13643_2015_129_MOESM1_ESM.pdf]

**Table S1: Recruitment Methods by Population Type**

| Method                         | MSM (%)   | FSW (%)  | MSW (%) | TSW (%) | MSM/TG (%) | FSW/MSM (%) | MSM/MSW (%) | MSM/MSW/TG (%) | MSM/MSW/TSW (%) | Total (%) |
|--------------------------------|-----------|----------|---------|---------|------------|-------------|-------------|----------------|-----------------|-----------|
| RDS                            | 56 (20.9) | 19 (7.1) | 0       | 0       | 1 (0.4)    | 1 (0.4)     | 0           | 0              | 0               | 77 (28.7) |
| TLS                            | 36 (13.4) | 1 (0.4)  | 1 (0.4) | 0       | 0          | 0           | 1 (0.4)     | 3 (1.1)        | 0               | 42 (15.7) |
| Convenience                    | 26 (9.7)  | 5 (1.9)  | 0       | 1 (0.4) | 1 (0.4)    | 0           | 0           | 0              | 0               | 33 (12.3) |
| Snowball                       | 25 (9.3)  | 10 (3.7) | 1 (0.4) | 0       | 0          | 0           | 0           | 0              | 0               | 36 (13.4) |
| Internet                       | 32 (11.9) | 0        | 1 (0.4) | 0       | 0          | 0           | 0           | 0              | 0               | 33 (12.3) |
| Targeted                       | 9 (3.4)   | 6 (2.2)  | 0       | 0       | 0          | 0           | 0           | 0              | 0               | 15 (5.6)  |
| Purposive                      | 2 (0.7)   | 2 (0.7)  | 0       | 0       | 2 (0.7)    | 0           | 0           | 0              | 0               | 6 (2.2)   |
| Multi-stage probability sample | 4 (1.5)   | 0        | 0       | 0       | 0          | 0           | 0           | 0              | 0               | 4 (1.5)   |
| Cluster                        | 0         | 3 (1.1)  | 0       | 0       | 0          | 0           | 0           | 0              | 0               | 3 (1.1)   |
| Convenience, Snowball          | 1 (0.4)   | 1 (0.4)  | 1 (0.4) | 0       | 0          | 0           | 0           | 0              | 0               | 3 (1.1)   |
| TLS, Internet                  | 2 (0.7)   | 0        | 0       | 0       | 0          | 0           | 0           | 0              | 0               | 2 (0.7)   |
| RDD                            | 2 (0.7)   | 0        | 0       | 0       | 0          | 0           | 0           | 0              | 0               | 2 (0.7)   |
| Convenience, Internet          | 1 (0.4)   | 0        | 0       | 0       | 0          | 0           | 0           | 0              | 1 (0.4)         | 2 (0.7)   |

|                                           |                   |                  |                |                |                |                |                |                |                |                |            |
|-------------------------------------------|-------------------|------------------|----------------|----------------|----------------|----------------|----------------|----------------|----------------|----------------|------------|
| Convenience, RDD                          | 1 (0.4)           | 0                | 0              | 0              | 0              | 0              | 0              | 0              | 0              | 0              | 1 (0.4)    |
| Convenience, RDS                          | 1 (0.4)           | 0                | 0              | 0              | 0              | 0              | 0              | 0              | 0              | 0              | 1 (0.4)    |
| Internet, Snowball                        | 1 (0.4)           | 0                | 0              | 0              | 0              | 0              | 0              | 0              | 0              | 0              | 1 (0.4)    |
| RDS, TLS                                  | 1 (0.4)           | 1 (0.4)          | 0              | 0              | 0              | 0              | 0              | 0              | 0              | 0              | 2 (0.7)    |
| Stratified probability sampling, Internet | 1 (0.4)           | 0                | 0              | 0              | 0              | 0              | 0              | 0              | 0              | 0              | 1 (0.4)    |
| Targeted, Snowball                        | 1 (0.4)           | 0                | 0              | 0              | 0              | 0              | 0              | 0              | 0              | 0              | 1 (0.4)    |
| Convenience, Snowball, Internet           | 1 (0.4)           | 0                | 0              | 0              | 0              | 0              | 0              | 0              | 0              | 0              | 1 (0.4)    |
| Snowball, TLS, RDS                        | 1 (0.4)           | 0                | 0              | 0              | 0              | 0              | 0              | 0              | 0              | 0              | 1 (0.4)    |
| RDS, Internet                             | 1 (0.4)           | 0                | 0              | 0              | 0              | 0              | 0              | 0              | 0              | 0              | 1 (0.4)    |
| <b>Total</b>                              | <b>205 (76.5)</b> | <b>48 (17.9)</b> | <b>4 (1.5)</b> | <b>1 (0.4)</b> | <b>4 (1.5)</b> | <b>1 (0.4)</b> | <b>1 (0.4)</b> | <b>3 (1.1)</b> | <b>1 (0.4)</b> | <b>1 (0.4)</b> | <b>268</b> |
