# Supplementary material for: Hard-to-reach populations of men who have sex with men and sex workers: a systematic review on sampling methods
Source: PubMed Central journal article supplement (PMC4627393; doi:10.1186/s13643-015-0129-9), 2015-10-30
Supplement: 13643_2015_129_MOESM2_ESM.pdf [file 13643_2015_129_MOESM2_ESM.pdf]

**Table S2: Country/Region of the studies by population type**

| Country                      | MSM | FSW | MSW | TSW | MSM/TG | FSW/MSM | MSM/MSW | MSM/MSW/TG | MSM/MSW/TSW | Total (%) | References                                                                                                                            |
|------------------------------|-----|-----|-----|-----|--------|---------|---------|------------|-------------|-----------|---------------------------------------------------------------------------------------------------------------------------------------|
| Afghanistan                  | 0   | 1   | 0   | 0   | 0      | 0       | 0       | 0          | 0           | 1 (0.4)   | [151]                                                                                                                                 |
| Argentina                    | 4   | 0   | 0   | 0   | 0      | 0       | 0       | 0          | 0           | 4 (1.5)   | [7,40,69,183]                                                                                                                         |
| Asia                         | 1   | 0   | 0   | 0   | 0      | 0       | 0       | 0          | 0           | 1 (0.4)   | [203]                                                                                                                                 |
| Australia                    | 1   | 1   | 0   | 0   | 0      | 0       | 0       | 0          | 0           | 2 (0.8)   | [140,207]                                                                                                                             |
| Benin,<br>Guinea,<br>Senegal | 0   | 1   | 0   | 0   | 0      | 0       | 0       | 0          | 0           | 1 (0.4)   | [129]                                                                                                                                 |
| Brasil                       | 5   | 3   | 0   | 0   | 1      | 0       | 0       | 0          | 0           | 9 (3.4)   | [2,6,8,9,39,54,72,160,267]                                                                                                            |
| Cameroon                     | 2   | 0   | 0   | 0   | 0      | 0       | 0       | 0          | 0           | 2 (0.8)   | [70,171]                                                                                                                              |
| Canada                       | 2   | 0   | 0   | 0   | 0      | 0       | 0       | 0          | 0           | 2 (0.8)   | [100,145]                                                                                                                             |
| China                        | 31  | 14  | 1   | 0   | 0      | 0       | 1       | 0          | 0           | 47 (17.5) | [12,15,26–31,58–62,75,76,103,114,130,132,147,149,150,158,159,161,162,165–170,172,177,179,184,186,188,212,218,241,247,249,252,260–262] |
| Croatia                      | 4   | 0   | 0   | 0   | 0      | 0       | 0       | 0          | 0           | 4 (1.5)   | [4,5,25,180]                                                                                                                          |
| Croatia,<br>Montenegro       | 0   | 1   | 0   | 0   | 0      | 0       | 0       | 0          | 0           | 1 (0.4)   | [251]                                                                                                                                 |
| El Salvador                  | 1   | 0   | 0   | 0   | 0      | 0       | 0       | 0          | 0           | 1 (0.4)   | [64]                                                                                                                                  |
| Estonia                      | 1   | 1   | 0   | 0   | 0      | 0       | 0       | 0          | 0           | 2 (0.8)   | [55,146]                                                                                                                              |
| Europe                       | 2   | 0   | 0   | 0   | 0      | 0       | 0       | 0          | 0           | 2 (0.8)   | [126,219]                                                                                                                             |
| Gambia                       | 1   | 0   | 0   | 0   | 0      | 0       | 0       | 0          | 0           | 1 (0.4)   | [187]                                                                                                                                 |
| Germany                      | 1   | 0   | 0   | 0   | 0      | 0       | 0       | 0          | 0           | 1 (0.4)   | [204]                                                                                                                                 |
| Guatemala                    | 1   | 0   | 0   | 0   | 1      | 0       | 0       | 0          | 0           | 2 (0.8)   | [238,263]                                                                                                                             |
| Honduras                     | 0   | 1   | 0   | 0   | 0      | 0       | 0       | 0          | 0           | 1 (0.4)   | [21]                                                                                                                                  |

|                                 |   |   |   |   |   |   |   |   |   |          |                                                   |
|---------------------------------|---|---|---|---|---|---|---|---|---|----------|---------------------------------------------------|
| India                           | 5 | 8 | 0 | 0 | 1 | 0 | 0 | 0 | 0 | 14 (5.2) | [10,14,33,34,41,51,53,63,102,133,139,141,181,239] |
| Indonesia                       | 0 | 0 | 0 | 0 | 0 | 0 | 0 | 0 | 0 | 1        | 1 (0.4) [257]                                     |
| Israel                          | 1 | 1 | 0 | 0 | 0 | 0 | 0 | 0 | 0 | 0        | 2 (0.8) [136,138]                                 |
| Japan                           | 1 | 0 | 0 | 0 | 0 | 0 | 0 | 0 | 0 | 0        | 1 (0.4) [197]                                     |
| Kazakhstan                      | 1 | 0 | 0 | 0 | 0 | 0 | 0 | 0 | 0 | 0        | 1 (0.4) [3]                                       |
| Kenya                           | 1 | 3 | 0 | 0 | 0 | 0 | 0 | 0 | 0 | 0        | 4 (1.5) [157,173–175]                             |
| Lao                             | 1 | 0 | 0 | 0 | 0 | 0 | 0 | 0 | 0 | 0        | 1 (0.4) [105]                                     |
| Lebanon                         | 0 | 0 | 0 | 0 | 0 | 1 | 0 | 0 | 0 | 0        | 1 (0.4) [32]                                      |
| Malawi                          | 1 | 0 | 0 | 0 | 0 | 0 | 0 | 0 | 0 | 0        | 1 (0.4) [73]                                      |
| Malawi,<br>Namibia,<br>Botswana | 1 | 0 | 0 | 0 | 0 | 0 | 0 | 0 | 0 | 0        | 1 (0.4) [155]                                     |
| Malaysia                        | 1 | 0 | 0 | 0 | 0 | 0 | 0 | 0 | 0 | 0        | 1 (0.4) [90]                                      |
| Mexico                          | 1 | 1 | 0 | 0 | 0 | 0 | 0 | 0 | 0 | 0        | 2 (0.8) [121,142]                                 |
| Moldova                         | 0 | 1 | 0 | 0 | 0 | 0 | 0 | 0 | 0 | 0        | 1 (0.4) [77]                                      |
| Mongolia                        | 1 | 0 | 0 | 0 | 0 | 0 | 0 | 0 | 0 | 0        | 1 (0.4) [74]                                      |
| Netherlands                     | 3 | 0 | 0 | 0 | 0 | 0 | 0 | 0 | 0 | 0        | 3 (1.1) [189,217,222]                             |
| Nigeria                         | 4 | 0 | 0 | 0 | 0 | 0 | 0 | 0 | 0 | 0        | 4 (1.5) [1,143,185,237]                           |
| Peru                            | 2 | 0 | 0 | 0 | 0 | 0 | 0 | 0 | 0 | 0        | 2 (0.8) [115,123]                                 |
| Russia                          | 0 | 0 | 1 | 0 | 0 | 0 | 0 | 0 | 0 | 0        | 1 (0.4) [154]                                     |
| Russia, USA                     | 1 | 0 | 0 | 0 | 0 | 0 | 0 | 0 | 0 | 0        | 1 (0.4) [17]                                      |
| Singapore                       | 1 | 0 | 0 | 0 | 0 | 0 | 0 | 0 | 0 | 0        | 1 (0.4) [268]                                     |
| South Africa                    | 9 | 1 | 0 | 0 | 0 | 0 | 0 | 0 | 0 | 0        | 10 (3.7) [22,48,49,56,78,152,153,176,213,235]     |
| South Korea                     | 0 | 2 | 0 | 0 | 0 | 0 | 0 | 0 | 0 | 0        | 2 (0.8) [117,248]                                 |
| Spain                           | 1 | 0 | 0 | 0 | 0 | 0 | 0 | 0 | 0 | 0        | 1 (0.4) [128]                                     |

|                        |            |           |          |          |          |          |          |          |          |          |                  |                                                                                                                                                                                                                                                                                                       |
|------------------------|------------|-----------|----------|----------|----------|----------|----------|----------|----------|----------|------------------|-------------------------------------------------------------------------------------------------------------------------------------------------------------------------------------------------------------------------------------------------------------------------------------------------------|
| Swaziland              | 1          | 0         | 0        | 0        | 0        | 0        | 0        | 0        | 0        | 0        | 1 (0.4)          | [71]                                                                                                                                                                                                                                                                                                  |
| Sweden                 | 1          | 0         | 0        | 0        | 0        | 0        | 0        | 0        | 0        | 0        | 1 (0.4)          | [210]                                                                                                                                                                                                                                                                                                 |
| Switzerland            | 1          | 0         | 0        | 0        | 0        | 0        | 0        | 0        | 0        | 0        | 1 (0.4)          | [120]                                                                                                                                                                                                                                                                                                 |
| Tanzania<br>(Zanzibar) | 1          | 0         | 0        | 0        | 0        | 0        | 0        | 0        | 0        | 0        | 1 (0.4)          | [20]                                                                                                                                                                                                                                                                                                  |
| Thailand               | 3          | 1         | 1        | 0        | 0        | 0        | 0        | 3        | 0        | 0        | 8 (3.0)          | [66,81,86,97,98,108–110]                                                                                                                                                                                                                                                                              |
| Uganda                 | 2          | 0         | 0        | 0        | 0        | 0        | 0        | 0        | 0        | 0        | 2 (0.8)          | [16,65]                                                                                                                                                                                                                                                                                               |
| UK                     | 5          | 0         | 0        | 0        | 0        | 0        | 0        | 0        | 0        | 0        | 5 (1.9)          | [11,144,195,258,264]                                                                                                                                                                                                                                                                                  |
| USA                    | 95         | 5         | 1        | 1        | 1        | 0        | 0        | 0        | 0        | 0        | 103 (38.4)       | [13,79,80,82–85,87,122,124,125,127,131,156,163,164,190–194,196,198,199,223–228,243,253–256][18,23,24,35–38,88,89,91–95,99,134,135,137,200–202,205,206,208,229,244,266] [42–47,50,52,57,67,68,101,104,106,107,111,113,116,118,119,148,178,209,211,214,216,220,221,230–234,236,240,245,246,250,259,265] |
| USA, Puerto Rico       | 1          | 0         | 0        | 0        | 0        | 0        | 0        | 0        | 0        | 0        | 1 (0.4)          | [96]                                                                                                                                                                                                                                                                                                  |
| USA, Canada            | 1          | 0         | 0        | 0        | 0        | 0        | 0        | 0        | 0        | 0        | 1 (0.4)          | [215]                                                                                                                                                                                                                                                                                                 |
| Uzbekistan             | 0          | 1         | 0        | 0        | 0        | 0        | 0        | 0        | 0        | 0        | 1 (0.4)          | [182]                                                                                                                                                                                                                                                                                                 |
| Vietnam                | 1          | 1         | 0        | 0        | 0        | 0        | 0        | 0        | 0        | 0        | 2 (0.8)          | [19,242]                                                                                                                                                                                                                                                                                              |
| <b>Total</b>           | <b>205</b> | <b>48</b> | <b>4</b> | <b>1</b> | <b>4</b> | <b>1</b> | <b>1</b> | <b>3</b> | <b>1</b> | <b>1</b> | <b>268 (100)</b> |                                                                                                                                                                                                                                                                                                       |
